# Supplementary material for: Warm mid-Pliocene conditions without high climate sensitivity: the CCSM4-Utrecht (CESM 1.0.5) contribution to the PlioMIP2
Source: Copernicus journal article supplement (doi:10.5194/cp-2021-140), 2021-10-20
Supplement: Supplementary file [file cp-2021-140-AC2-supplement.pdf]

Figures supporting author comments on CP 2021-140

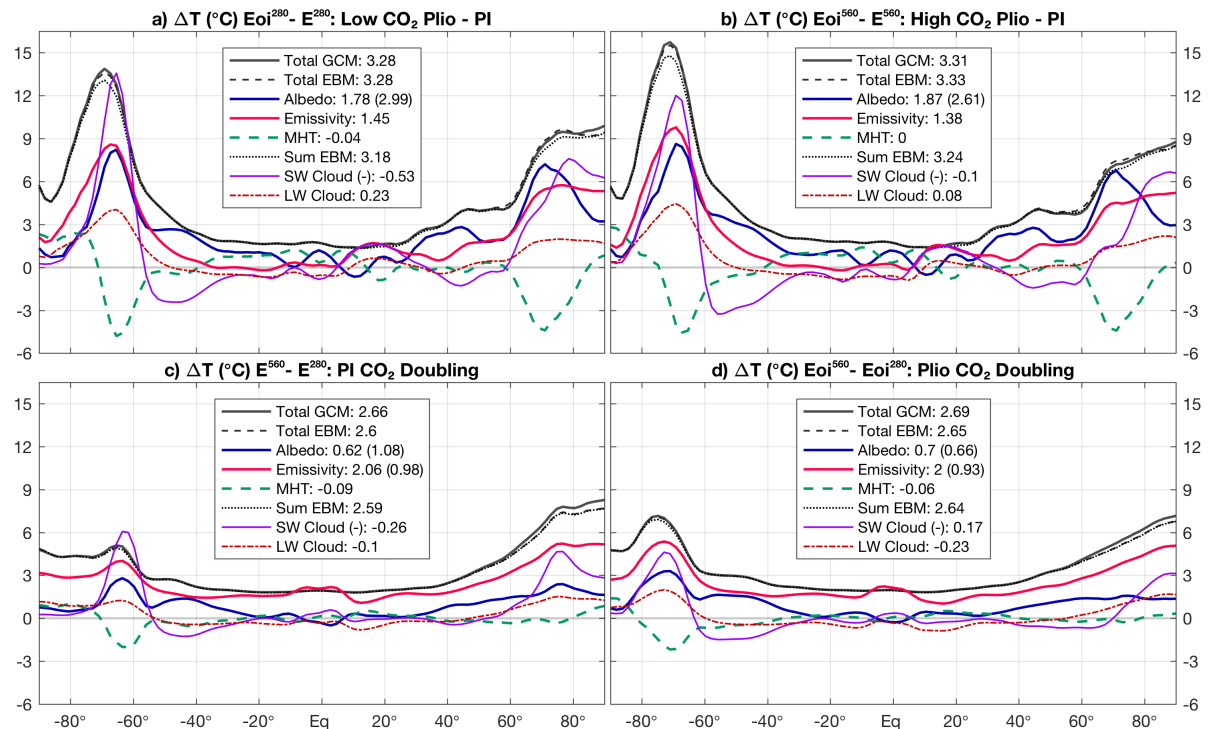

Figure C1: Energy balance analysis following Lunt et al. (2021), zonal average differences.

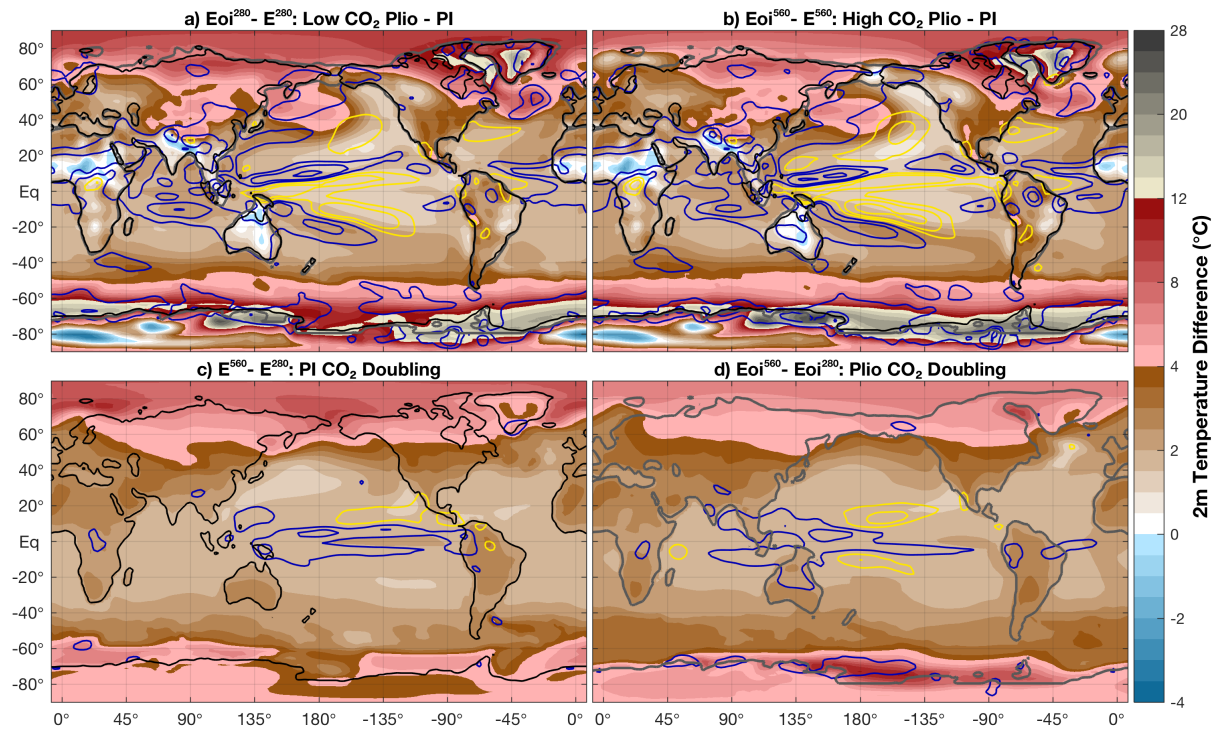

Figure C2: Altered version of Figure 10, with simplified colour scale and precipitation contours.

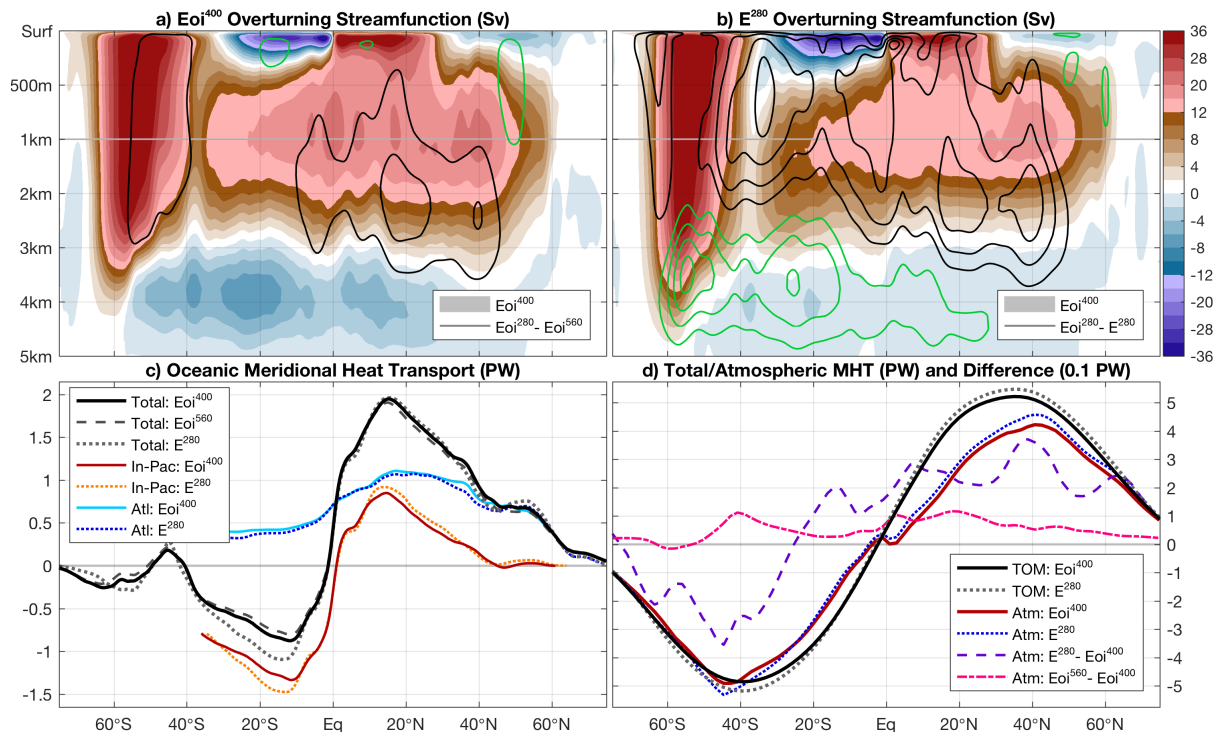

**Figure C3: Updated version of Figure 7, using contours for differences only.**
